# Supplementary material for: Weakening fibril–fibril interactions via an on-demand regulation of hemicellulose phase towards the facile disassembly of lignocellulose heterostructure into approaching native-state elementary fibrils
Source: Royal Society of Chemistry journal article supplement (doi:10.1039/d3gc04029a), 2023-12-07
Supplement: d3gc04029a1.pdf [file d3gc04029a1.pdf]

# Electronic Supporting Information

## Weakening fibril-fibril interactions via on-demand regulation of hemicellulose phase towards facile disassembly of lignocellulose heterostructure into approaching native-state elementary fibrils

*Yan Jiang, ‡<sup>a</sup> Xinyi Wang, ‡<sup>a</sup> Zhiqian Meng,<sup>a</sup> Mengyang Zhang,<sup>a</sup> Shuangfei Wang,<sup>a</sup>*

*Xiuyu Liu, \*<sup>b, c, d</sup>*

<sup>a</sup> College of Light Industry and Food Engineering, Guangxi University, Nanning 530004, P.R. China.

<sup>b</sup> School of Chemistry and Chemical Engineering, Guangxi Minzu University, Nanning 530006, P.R. China.

<sup>c</sup> Guangxi Bossco Environmental Protection Technology Co., Ltd., Nanning 530007, P.R. China.

<sup>d</sup> Guangxi Key Laboratory of Chemistry and Engineering of Forest Products, Nanning 530006, P.R. China.

\*Corresponding Author E-mail: [xiuyu.liu@gxun.edu.cn](mailto:xiuyu.liu@gxun.edu.cn) (Xiuyu Liu).

‡ Y. Jiang and X. Wang contributed equally.

Number of pages: 13

Number of tables: 7

Number of figures: 5

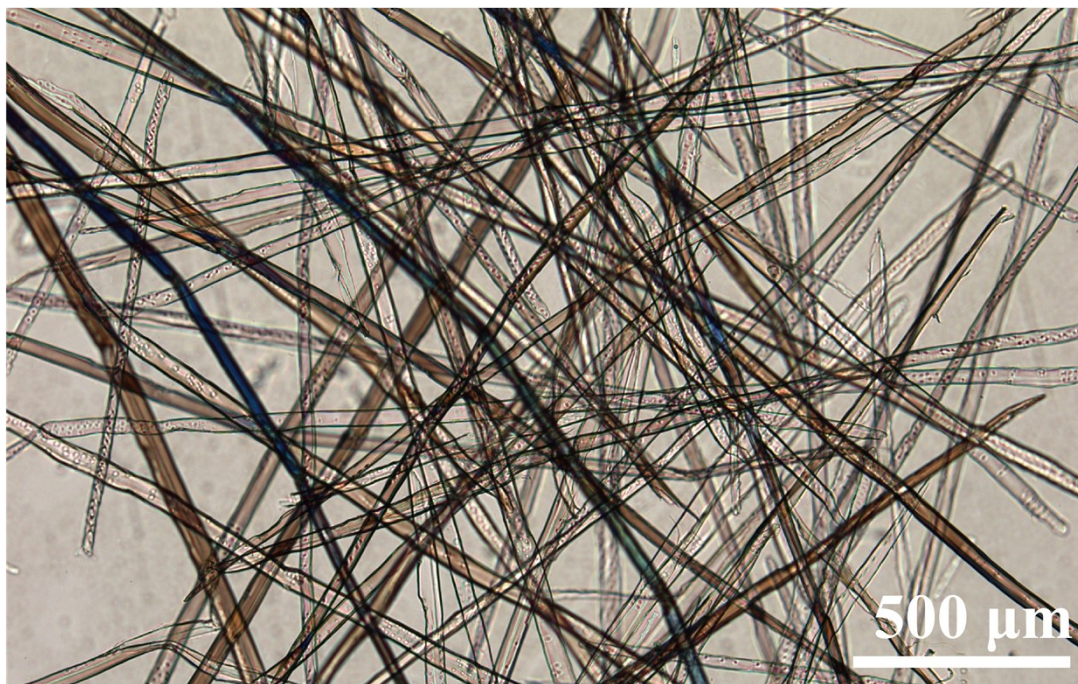

**Fig. S1** Optical micrograph of spruce holocellulose fibers.

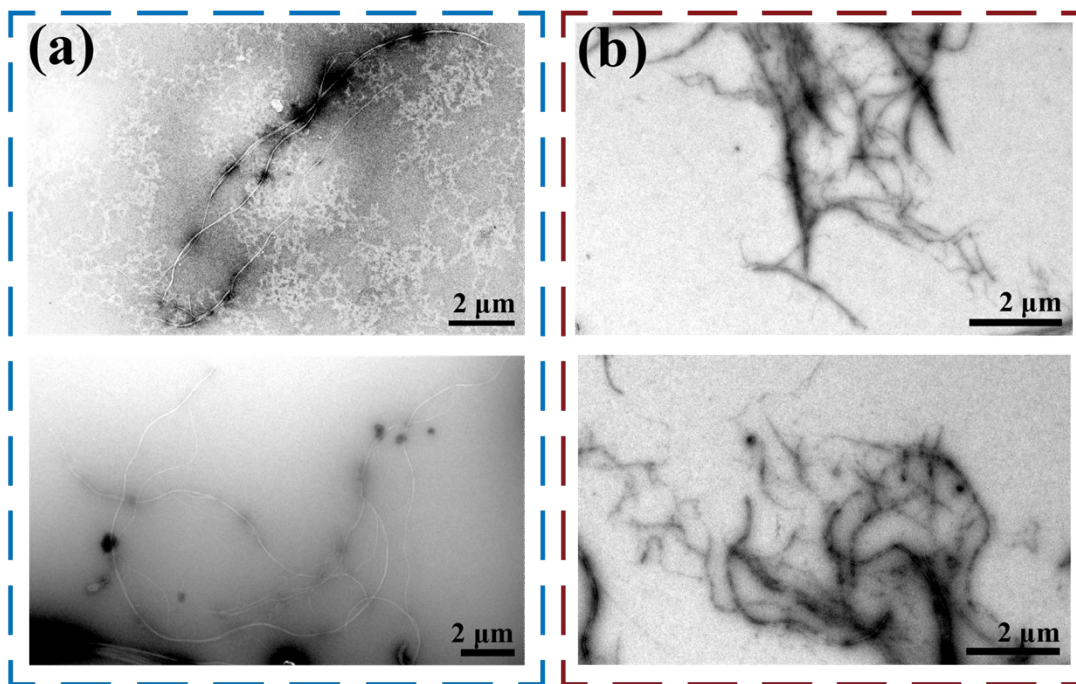

**Fig. S2** TEM images of (a) HCNF-24%IL-W, and (b) HCNF-50%IL-W.

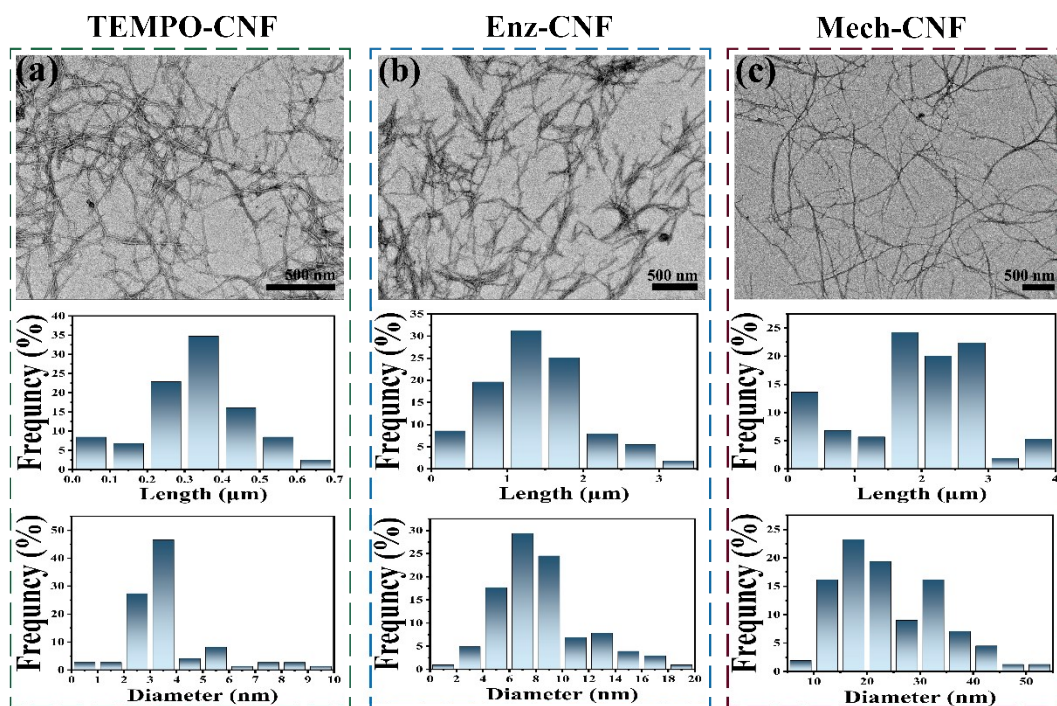

**Fig. S3** TEM images and TEM-based length and diameter distributions of (a) TEMPO-CNF, (b) Enz-CNF, and (c) Mech-CNF.

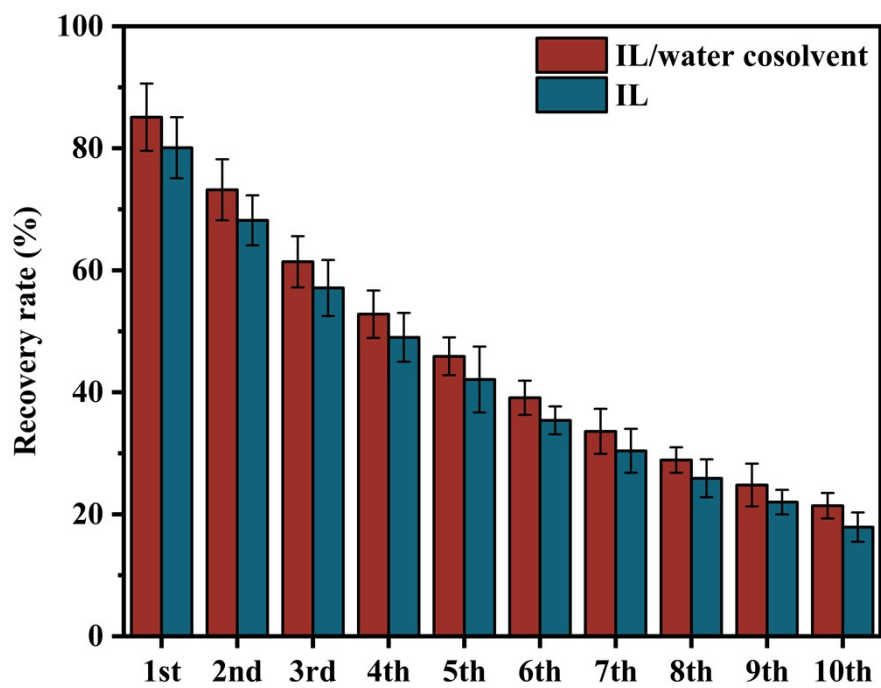

**Fig. S4** The recovery rate of IL/water cosolvent and IL at 1st~10th cycles.

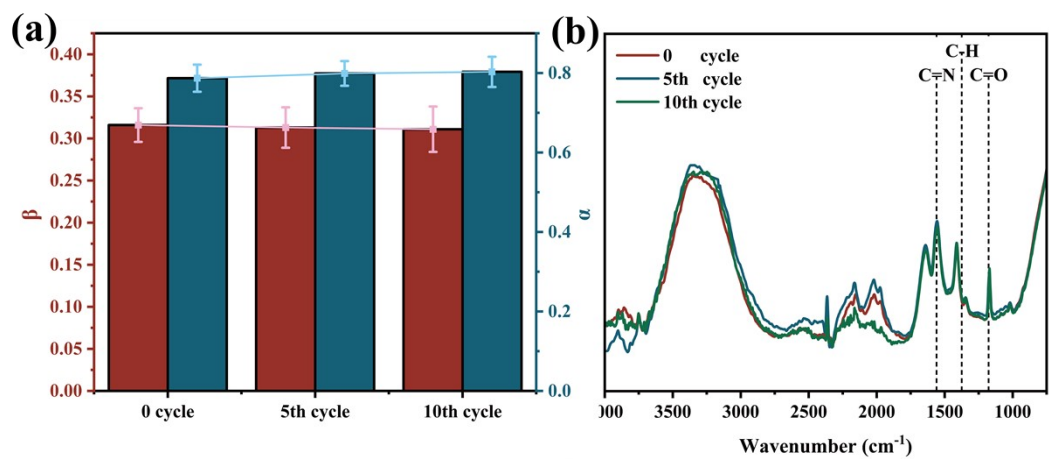

**Fig. S5** (a) Kamlet Taft hydrogen bond basicity  $\beta$  and hydrogen bond acidity  $\alpha$  values of the recovered IL/water cosolvent; (b) ATR-FTIR spectra of the ILs from the recovered IL/water cosolvent.



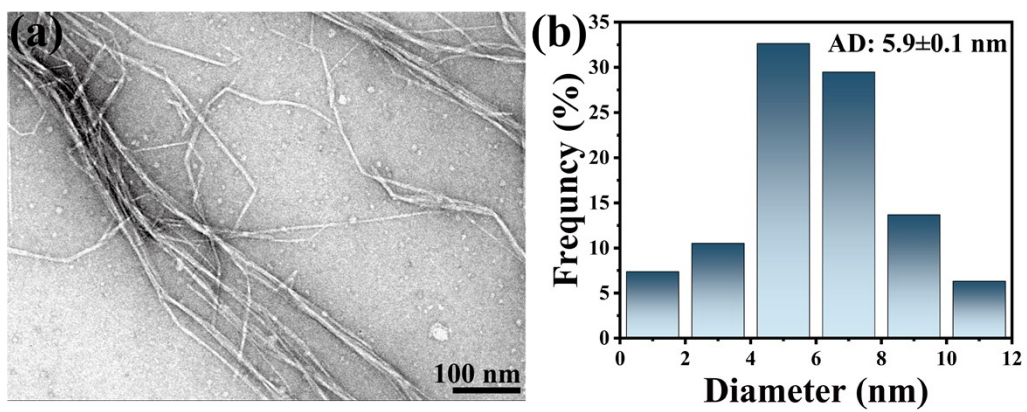

**Fig. S6** (a) TEM images and (b) TEM-based diameter distributions of the HCNF produced by using the 10-times recycled IL.

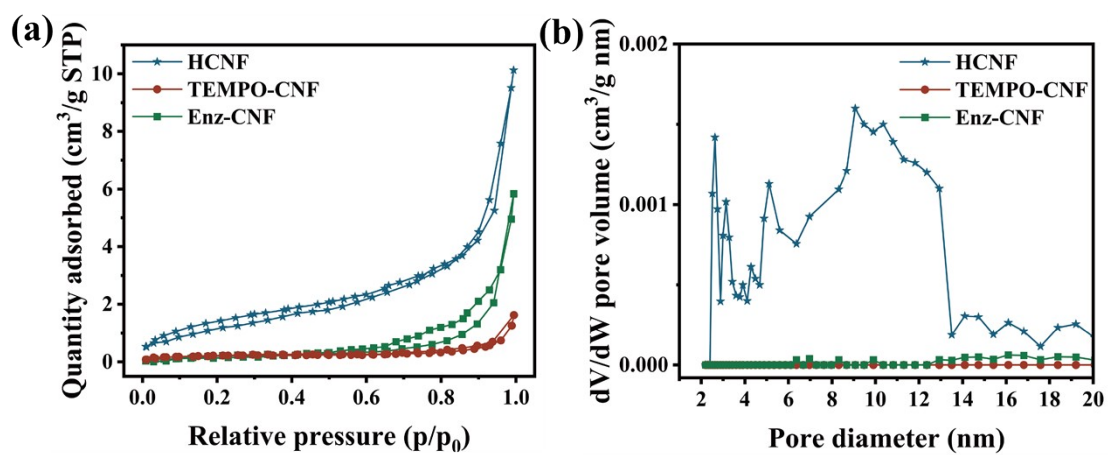

**Fig. S7** (a) N<sub>2</sub> adsorption-desorption isotherms and (b) BJH pore size distribution derived from N<sub>2</sub> adsorption for HCNF, TEMPO-CNF and Enz-CNF nanopapers.



**Table S1.** Kamlet Taft parameter of IL/water cosolvent at different IL concentration.

| IL<br>(wt%) | KT-parameter at 25°C |         |          |                |
|-------------|----------------------|---------|----------|----------------|
|             | $\beta$              | $\pi^*$ | $\alpha$ | $\beta-\alpha$ |
| 0           | 0.142                | 1.330   | 1.121    | -0.979         |
| 24          | 0.316                | 1.318   | 0.787    | -0.471         |
| 50          | 0.492                | 1.306   | 0.636    | -0.144         |
| 100         | 1.107                | 1.039   | 0.474    | 0.633          |

**Table S2.** Morphological characteristics for the high-aspect-ratio CNFs produced by

using different strategies.

| Precursor fibers                      | Protocol                                                        | Length ( $\mu\text{m}$ ) | Diameter (nm) | Aspect ratio | DP   | References                    |
|---------------------------------------|-----------------------------------------------------------------|--------------------------|---------------|--------------|------|-------------------------------|
| Bleached bamboo pulp fibers           | DES (ZnAc/ChCl) treatment and subsequent homogenization         | 14.3                     | 16.2          | 882          | \    | Ling et al. <sup>[1]</sup>    |
| Bleached spruce pulp fibers           | Carboxymethylation and subsequent mechanical blending           | 3.8                      | 3.9           | 1000         | 1300 | Zhou et al. <sup>[2]</sup>    |
| Bleached sulfite softwood pulp fibers | Maleic anhydride esterification followed by mechanical blending | ~1.3                     | ~3.2          | 390          | \    | Zhang et al. <sup>[3]</sup>   |
| Spruce holocellulose fibers           | Mechanical blending                                             | ~2.1                     | ~5.0          | 530          | 3460 | Yang et al. <sup>[4]</sup>    |
| Softwood holocellulose fibers         | High-pressure microfluidization                                 | ~3.0                     | ~5.0          | 600          | 3800 | Galland et al. <sup>[5]</sup> |
| Spruce holocellulose fibers           | Mechanical blending                                             | ~2.0                     | ~3.4          | 580          | 3400 | Yang et al. <sup>[6]</sup>    |

**Table S3.** Estimated costs of materials and unities per ton of HCNF.

|           | Categories                                  | Consumption<br>(ton/kW·h) | Price<br>(CNY·ton <sup>-1</sup> ) | Cost<br>(CNY) | Sources                                  |
|-----------|---------------------------------------------|---------------------------|-----------------------------------|---------------|------------------------------------------|
| Materials | Spruce holocellulose fibers                 | 1                         | 13400                             | 13400         | Guangxi Jianing Pulp Co., Ltd.           |
|           | 1-Ethyl-3-methylimidazolium acetate (99.5%) | 8                         | 50000                             | 400000        | Guangzhou Ruishi Biotechnology Co., Ltd. |
| Utilities | Water                                       | 75                        | 5.59                              | 420           | Xixiangtang District, Nanning, China     |
|           | Electricity                                 | 3293                      | 0.83                              | 2733          | Xixiangtang District, Nanning, China     |

**Table S4.** Estimated costs of materials and unities per ton of TEMPO-CNF.

|           | Categories         | Consumption<br>(ton/kW·h) | Price<br>(CNY·ton <sup>-1</sup> ) | Cost<br>(CNY) | Sources                                     |
|-----------|--------------------|---------------------------|-----------------------------------|---------------|---------------------------------------------|
| Materials | Bleached pine pulp | 1                         | 7750                              | 7750          | Qingdao Junuo International Trade Co., Ltd. |
|           | TEMPO (98%)        | 0.016                     | 2516000                           | 40256         | Shanghai Aladdin Reagent Co., Ltd.          |
|           | NaBr (99%)         | 0.1                       | 200000                            | 20000         | Shanghai Aladdin Reagent Co., Ltd.          |
|           | NaClO (5%)         | 1.12                      | 34000                             | 38080         | Shanghai Aladdin Reagent Co., Ltd.          |
|           | NaOH (99%)         | 2                         | 4000                              | 8000          | Maoming Xiongda Chemical Co. Ltd.           |
| Utilities | Water              | 940                       | 5.59                              | 5255          | Xixiangtang District, Nanning, China        |
|           | Electricity        | 35168                     | 0.83                              | 29189         | Xixiangtang District, Nanning, China        |

**Table S5.** Main technical data of the equipment used for producing TEMPO-CNF and HCNF.

| Equipment                     | Model       | Technical data       |                             |            | Manufacturers                           |
|-------------------------------|-------------|----------------------|-----------------------------|------------|-----------------------------------------|
|                               |             | Speed (rpm)          | Capacity (t)                | Power (kW) |                                         |
| Electric blender              | ZXY-90      | 30000                | 3.3                         | 6~7        | Anhui Shuangjie Manufacturing Co., Ltd. |
| Supermasscolloider            | MKZB20-100J | Speed (rpm)          | Capacity (Kg/h)             | Power (kW) | Masuko Sangyo Co.,Ltd.                  |
|                               |             | 1500                 | 1200~6000                   | 38~76      |                                         |
| Centrifugal machine           | 4-5KL       | Speed (rpm)          | Capacity (Kg)               | Power (kW) | KingHwa Medical Scientific Co.,Ltd.     |
|                               |             | 13500                | 3                           | 1.2        |                                         |
| Circulating water vacuum pump | SHB-III     | Maximum vacuum (MPa) | Air volume per head (L/min) | Power (kW) | Nanning Boyu Instrument Co.,Ltd.        |
|                               |             | 0.098                | 10                          | 0.18       |                                         |

## References

1. Z. Ling, J. Y. Zhao, Y. Xie, L. X. Dai, L. Feng, J. F. Ma and Q. Yong, *Ind. Crop. Prod.*, 2022, **187**.
2. J. Zhou, Z. Q. Fang, K. H. Chen, J. Y. Cui, D. J. Yang and X. Q. Qiu, *Carbohydr. Polym.*, 2022, **296**.
3. D. Zhang, K. X. Jin, K. H. Lim, S. Y. Jie, W. J. Wang and X. Yang, *Green Chem.*, 2023, **25**, 4696-4704.
4. X. Yang, M. S. Reid, P. Olsen and L. A. Berglund, *ACS Nano*, 2020, **14**, 724-735.
5. S. Galland, F. Berthold, K. Prakobna and L. A. Berglund, *Biomacromolecules*, 2015, **16**, 2427-2435.
6. X. Yang, E. Jungstedt, M. S. Reid and L. A. Berglund, *Macromolecules*, 2021, **54**, 4443-4452.
